# Supplementary material for: Highly Efficient Enzymatic Preparation of Daidzein in Deep Eutectic Solvents
Source: PubMed Central journal article supplement (PMC6155624; doi:10.3390/molecules22010186), 2017-01-22
Supplement: molecules-22-00186-s001.pdf [file molecules-22-00186-s001.pdf]

# Supplementary Materials: Highly Efficient Enzymatic Preparation of Daidzein in Deep Eutectic Solvents

Qi-Bin Cheng and Li-Wei Zhang

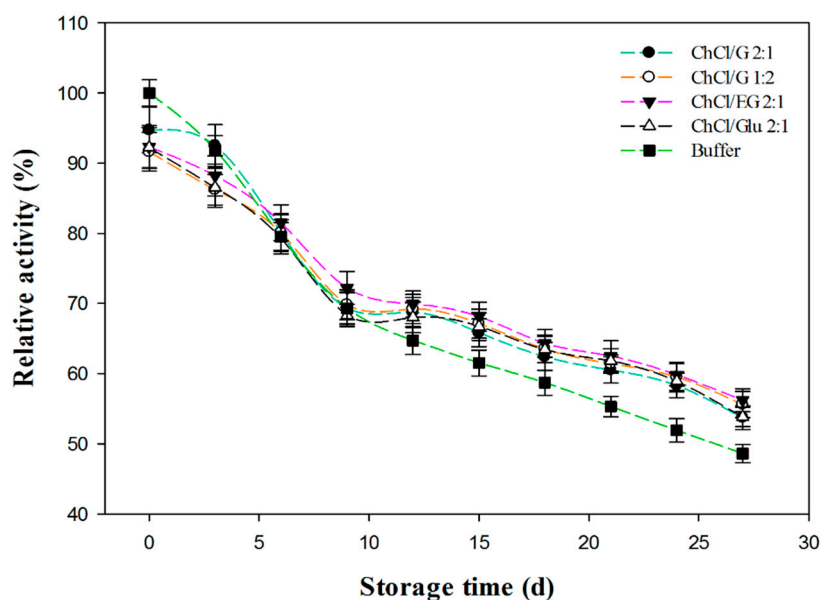

**Figure S1.** Storage-stability (room temperature) of  $\beta$ -D-glucosidase in phosphate buffer (0.1 M, pH 5.8) containing different DESs (20 vol %).

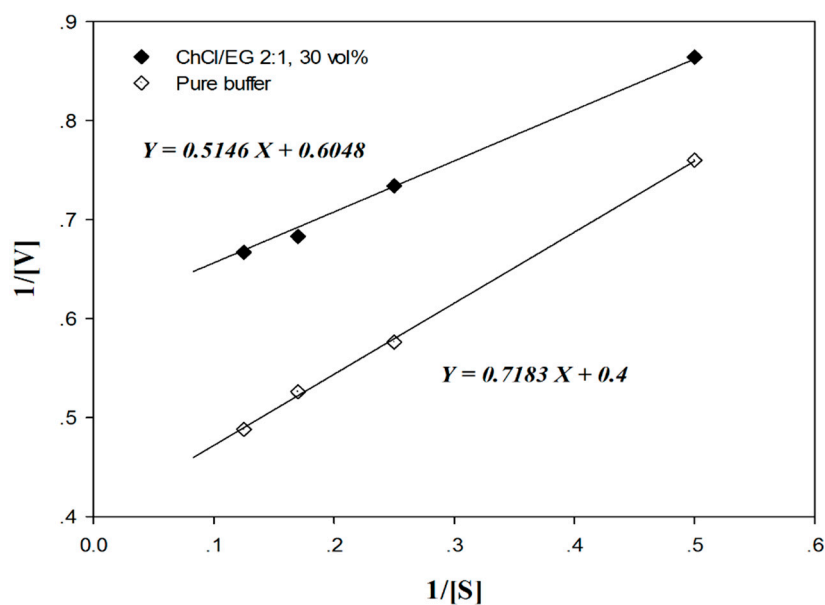

**Figure S2.** The Lineweaver-Burk plots of  $\beta$ -D-glucosidase in ChCl/EG 2:1 (30 vol %) and phosphate buffer (0.1 M, pH 5.8).

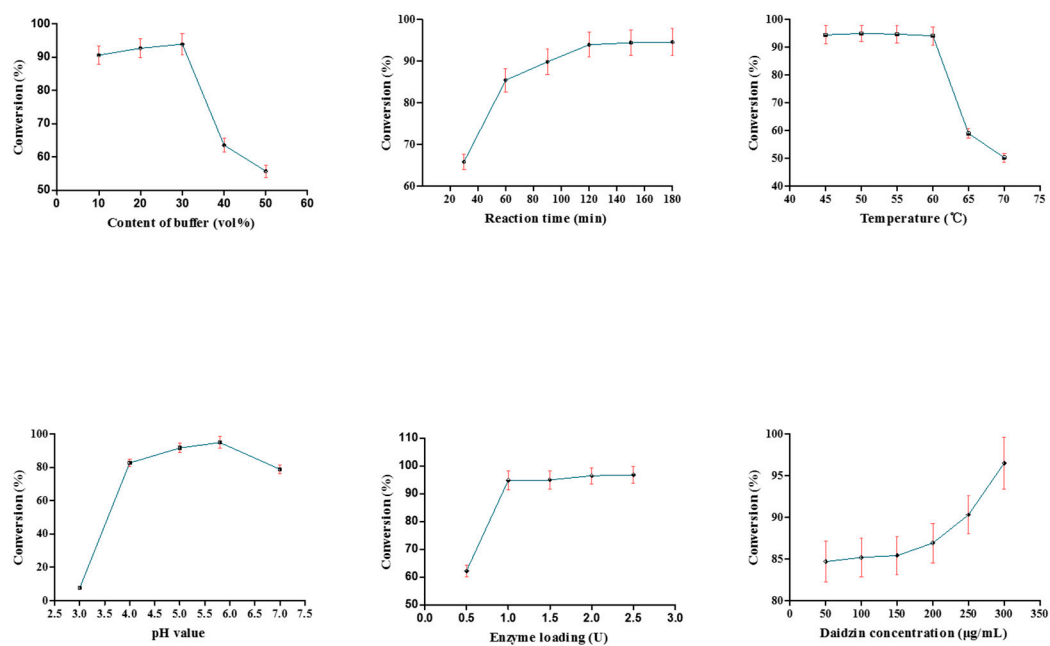

**Figure S3.** The single-factor test for the enzymatic preparation of daidzein.

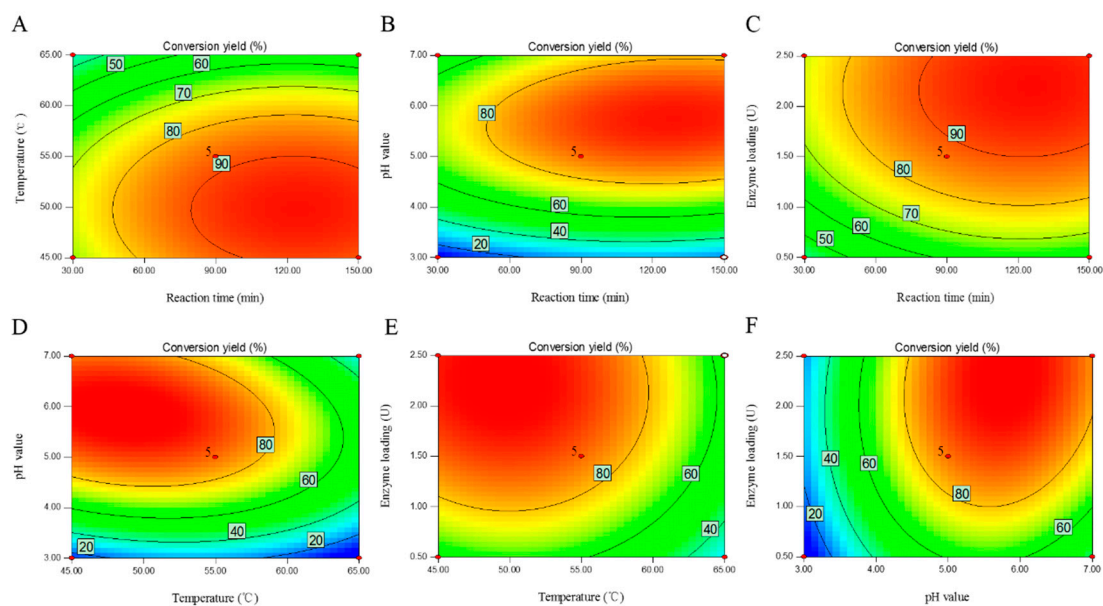

**Figure S4.** Contour map showing the effects of (A) reaction time and temperature; (B) reaction time and pH value; (C) reaction time and enzyme loading; (D) temperature and pH value; (E) temperature and enzyme loading; (F) pH value and enzyme loading on the conversion yield of daidzein.

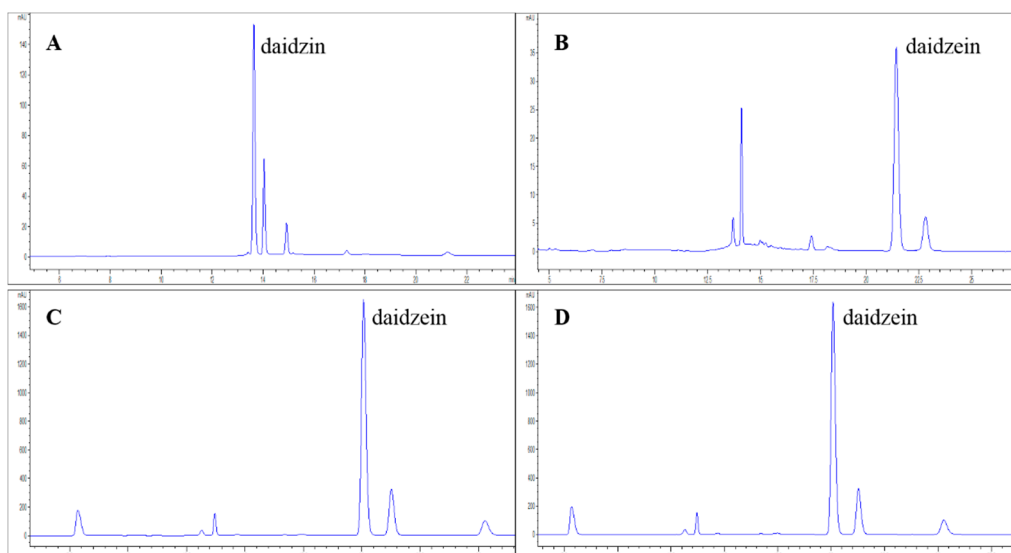

**Figure S5.** Chromatogram obtained for the reaction before (A) and after (B) and the crude product of daidzein (C,D).

**Table S1.** Observed response in Box-Behnken design (BBD) for the enzymatic preparation of daidzein.

| Batch | Preparation of Daidzein |        |   |       |                               |
|-------|-------------------------|--------|---|-------|-------------------------------|
|       | Independent Variables   |        |   |       | Dependent Variable (Response) |
|       | A (min)                 | B (°C) | C | D (U) | R = Conversion Yield (%)      |
| 1     | 150                     | 55     | 5 | 0.5   | 57.3                          |
| 2     | 90                      | 45     | 7 | 1.5   | 79.5                          |
| 3     | 150                     | 55     | 4 | 1.5   | 17.2                          |
| 4     | 30                      | 45     | 5 | 1.5   | 69.3                          |
| 5     | 90                      | 65     | 5 | 2.5   | 52.6                          |
| 6     | 90                      | 55     | 5 | 1.5   | 79.9                          |
| 7     | 30                      | 55     | 5 | 2.5   | 76.5                          |
| 8     | 90                      | 65     | 7 | 1.5   | 32.5                          |
| 9     | 90                      | 55     | 5 | 1.5   | 89.5                          |
| 10    | 90                      | 65     | 3 | 1.5   | 7.4                           |
| 11    | 30                      | 55     | 3 | 1.5   | 8.1                           |
| 12    | 90                      | 55     | 5 | 1.5   | 90.7                          |
| 13    | 150                     | 65     | 5 | 1.5   | 52.5                          |
| 14    | 90                      | 45     | 5 | 2.5   | 95.8                          |
| 15    | 90                      | 45     | 5 | 0.5   | 63.4                          |
| 16    | 90                      | 55     | 3 | 0.5   | 6.8                           |
| 17    | 90                      | 55     | 7 | 2.5   | 77.8                          |
| 18    | 30                      | 65     | 5 | 1.5   | 29.1                          |
| 19    | 150                     | 55     | 5 | 2.5   | 96.8                          |
| 20    | 30                      | 55     | 5 | 0.5   | 38.5                          |
| 21    | 90                      | 55     | 5 | 1.5   | 88.2                          |
| 22    | 90                      | 55     | 3 | 2.5   | 18.3                          |
| 23    | 90                      | 65     | 5 | 0.5   | 26.7                          |
| 24    | 90                      | 55     | 7 | 0.5   | 43.6                          |
| 25    | 90                      | 45     | 3 | 1.5   | 10.5                          |
| 26    | 150                     | 45     | 5 | 1.5   | 93.5                          |
| 27    | 90                      | 55     | 5 | 1.5   | 88.4                          |
| 28    | 30                      | 55     | 7 | 1.5   | 54.8                          |
| 29    | 150                     | 55     | 7 | 1.5   | 78.2                          |
